# Supplementary material for: Essential function of the alveolin network in the subpellicular microtubules and conoid assembly in Toxoplasma gondii
Source: eLife journal article supplement (doi:10.7554/elife.56635), 2020-05-07
Supplement: supp [file elife-56635-supp-v1.zip]

Archive with 15 entries (15 files):
- elife_poa_e56635_Transparent_Reporting_File.pdf
- elife_poa_e56635_Figure_1_figure_supplement_1.pdf
- elife_poa_e56635_Figure_2_figure_supplement_1.pdf
- elife_poa_e56635_Figure_3_figure_supplement_1.pdf
- elife_poa_e56635_Figure_4_figure_supplement_1.pdf
- elife_poa_e56635_Figure_5_figure_supplement_1.pdf
- elife_poa_e56635_Figure_6_figure_supplement_1.pdf
- elife_poa_e56635_Figure_7_figure_supplement_1.pdf
- elife_poa_e56635_Video_1.mp4
- elife_poa_e56635_Supplementary_file_1.xlsx
- elife_poa_e56635_Supplementary_file_2.xlsx
- elife_poa_e56635_Supplementary_file_3.docx
- elife_poa_e56635_Supplementary_file_4.xlsx
- elife_poa_e56635_Figure_7_source_data_1.xlsx
- elife_poa_e56635_Figure_7_source_data_2.xlsx
