# Supplementary material for: Essential function of the alveolin network in the subpellicular microtubules and conoid assembly in Toxoplasma gondii
Source: eLife journal article supplement (doi:10.7554/elife.56635), 2020-05-07
Supplement: supp [file elife-56635-supp-v1.zip › elife_poa_e56635_Figure_7_source_data_1.xlsx]

## Sheet: Chi2 test et Cohen's D
RAW DATA
	Summary	Normal	Opened ring	Major cyto defects		Summary	Normal	Opened ring	Major cyto defects
WT	n total	54	0	0		%	100	0	0
	n total	128	0	2		%	98.4615	0	1.53846
AC9	n total	12	12	94		%	10.1695	10.1695	79.661
	n total	22	18	141		%	12.1547	9.94475	77.9006
AC10	n total	19	17	57		%	20.4301	18.2796	61.2903
	n total	23	20	93		%	16.9118	14.7059	68.3824
TEST ON THE GLOBAL EFFECT : Chi2 test WT/AC9/AC10
Real values		Normal	Opened ring	Major cyto defects	SUM
	WT	182	0	2	184
	AC9	34	30	235	299
	AC10	42	37	150	229
	SUM	258	67	387	712
Expected values		Normal	Opened ring	Major cyto defects	SUM
	WT	66.6742	17.3146	100.011	184
	AC9	108.346	28.1362	162.518	299
	AC10	82.9803	21.5492	124.471	229
	SUM	258	67	387	712
	Chi2	2.2007e-92
COMPARISON TESTS 2 BY 2
Method 1: Fisher test (details in the next page)
p values table (summary)
Categories	WT vs AC9	WT vs AC10	AC9 vs AC10
Normal vs Opened rings	p<0.0001	p<0.0001	p>0.9999
Normal vs Major cyto defect	p<0.0001	p<0.0001	p>0.9999
Interpretation	The test compares the distribution of events of 2 groups in 2 categories (it compares the data of a contingency table).
	For example, if we take the 1st Normal vs opened ring case in WT vs AC9, the significance is great because the distribution between the 2 groups (WT / AC9) in the Normal / Open Ring categories is opposed
	Another example, Normal vs opened ring in AC9 vs AC10, no significance because the distribution of the 2 groups is similar in the 2 categories
Method 2 : Standardized deviations from expected values
The difference is significant if < -2 or > 2
		Normal	Opened ring	Major cyto defects
	WT	20.5392	-5.07679	-16.8451
	AC9	-11.7443	0.484711	11.0495
	AC10	-6.84016	4.24584	4.11219
Interpretation	The number of "normal" events is greatly over-represented in WT and under-represented in AC9 / AC10 compared to the expected values
	The number of "Opened ring" events is under-represented in WT, identical to the expected values in AC9 and over-represented in AC10 compared to the expected values
	The number of "Major cytodefect" events is under-represented in WT, and over-represented in AC9 / AC10 compared to expected values
Complementary approach : Size effect (Cohen's D coefficient)
		Raw	Normal	Opened ring	Major cyto defects
	WT	average	91	0	1
	AC9	average	17	15	117.5
	AC10	average	21	18.5	75
	WT	sd	52.3259	0	1.41421
	AC9	sd	7.07107	4.24264	33.234
	AC10	sd	2.82843	2.12132	25.4558
An effect is considered "strong" when the Cohen coefficient (Cohen's D) is greater than 1
CALCUL COHEN'S D
		Average 1	Average 2	SD1	SD2	Cohen's d	n1	n2
NORMAL	WT vs AC9	91	17	52.3259	7.07107	1.98198	2	2
	WT vs AC10	91	21	52.3259	2.82843	1.88913	2	2
	AC9 vs AC10	17	21	7.07107	2.82843	0.742781	2	2
OPEN RING	WT vs AC9	0	15	0	4.24264	5	2	2
	WT vs AC10	0	18.5	0	2.12132	12.3333	2	2
	AC9 vs AC10	15	18.5	4.24264	2.12132	1.0435	2	2
MAJOR CYTO DEFECTS	WT vs AC9	1	117.5	1.41421	33.234	4.95296	2	2
	WT vs AC10	1	75	1.41421	25.4558	4.10478	2	2
	AC9 vs AC10	117.5	75	33.234	25.4558	1.43574	2	2

## Sheet: Fisher test - Detail
Table Analyzed	Fisher 2by2 WT/AC9 for Normal/OpenRing					Table Analyzed	Fisher 2by2 WT/AC10 for Normal/OpenRing					Table Analyzed	Fisher 2by2 AC9/AC10 Normal/OpenRing
P value and statistical significance						P value and statistical significance						P value and statistical significance
Test	Fisher's exact test					Test	Fisher's exact test					Test	Fisher's exact test
P value	<0,0001					P value	<0,0001					P value	>0,9999
P value summary	****					P value summary	****					P value summary	ns
One- or two-sided	Two-sided					One- or two-sided	Two-sided					One- or two-sided	Two-sided
Statistically significant (P < 0.05)?	Yes					Statistically significant (P < 0.05)?	Yes					Statistically significant (P < 0.05)?	No
Effect size	Value	95% CI				Effect size	Value	95% CI				Effect size	Value	95% CI
Odds ratio	Infinity	42,21 to Infinity				Odds ratio	Infinity	39,11 to Infinity				Odds ratio	0.9984	0,5039 to 1,932
Reciprocal of odds ratio	0	0,000 to 0,02369				Reciprocal of odds ratio	0	0,000 to 0,02557				Reciprocal of odds ratio	1.002	0,5176 to 1,985
Methods used to compute CIs						Methods used to compute CIs						Methods used to compute CIs
Odds ratio	Baptista-Pike					Odds ratio	Baptista-Pike					Odds ratio	Baptista-Pike
Table Analyzed	Fisher 2by2 WT/AC9 Normal/Major cyto defect					Table Analyzed	Fisher 2by2 WT/AC10 Normal/Major cyto defect					Table Analyzed	FIsher 2by2 AC9/AC10 Normal/Major cyto defect
P value and statistical significance						P value and statistical significance						P value and statistical significance
Test	Fisher's exact test					Test	Fisher's exact test					Test	Fisher's exact test
P value	<0,0001					P value	<0,0001					P value	>0,9999
P value summary	****					P value summary	****					P value summary	ns
One- or two-sided	Two-sided					One- or two-sided	Two-sided					One- or two-sided	Two-sided
Statistically significant (P < 0.05)?	Yes					Statistically significant (P < 0.05)?	Yes					Statistically significant (P < 0.05)?	No
Effect size	Value	95% CI				Effect size	Value	95% CI				Effect size	Value	95% CI
Odds ratio	629	163,2 to 2621				Odds ratio	325	85,53 to 1357				Odds ratio	0.9984	0,5039 to 1,932
Reciprocal of odds ratio	0.00159	0,0003815 to 0,006127				Reciprocal of odds ratio	0.003077	0,0007370 to 0,01169				Reciprocal of odds ratio	1.002	0,5176 to 1,985
Methods used to compute CIs						Methods used to compute CIs						Methods used to compute CIs
Odds ratio	Baptista-Pike					Odds ratio	Baptista-Pike					Odds ratio	Baptista-Pike
