# Supplementary material for: Essential function of the alveolin network in the subpellicular microtubules and conoid assembly in Toxoplasma gondii
Source: eLife journal article supplement (doi:10.7554/elife.56635), 2020-05-07
Supplement: supp [file elife-56635-supp-v1.zip › elife_poa_e56635_Figure_7_source_data_2.xlsx]

## Sheet: ANOVA
ANOVA summary
F	69.6
P value	<0,0001
P value summary	****
Significant diff. among means (P < 0.05)?	Yes
R square	0.4715
Tukey's All Pairs Comparison
Comparison	Mean Difference	│q│	P value	95%CL
AC10/+IAA .vs. WT	641.929	14.5778	<0,0001	494,57 to 789,29
AC10/+IAA .vs. AC9/+IAA	81.5	1.4795	0.549	-102,85 to 265,85
AC9/+IAA .vs. WT	560.429	11.823	<0,0001	401,8 to 719,06
Brown-Forsythe test
F (DFn, DFd)	31,88 (2, 156)
P value	<0,0001
P value summary	****
Are SDs significantly different (P < 0.05)?	Yes
Bartlett's test
Bartlett's statistic (corrected)	305.4
P value	<0,0001
P value summary	****
Are SDs significantly different (P < 0.05)?	Yes
ANOVA table	SS	DF	MS	F (DFn, DFd)	P value
Treatment (between columns)	14423875	2	7211938	F (2, 156) = 69,60	P<0,0001
Residual (within columns)	16164480	156	103618
Total	30588356	158
Data summary
Number of treatments (columns)	3
Number of values (total)	159
