# Supplementary material for: Essential function of the alveolin network in the subpellicular microtubules and conoid assembly in Toxoplasma gondii
Source: eLife journal article supplement (doi:10.7554/elife.56635), 2020-05-07
Supplement: supp [file elife-56635-supp-v1.zip › elife_poa_e56635_Supplementary_file_1.xlsx]

## Sheet: Sheet1
	Accession Number	Transciptomic	IP - Biotin	IP + Biotin	CRISPR,s score
AC9	TGGT1_246950	Late S1 + M	3	14	-3.88
AC2	TGGT1_250820	Late S1 + M	0	27	0.5
AC8	TGGT1_229640	Late S1 + M	0	27	-0.1
AC4	TGGT1_214880	Late S1 + M	0	4	0.01
hypothetical protein	TGGT1_292950	Late S1 + M	0	55	-2.58
putative kinesin heavy chain	TGGT1_273560	Late S1 + M	3	13	-0.94
hypothetical protein	TGGT1_205320	Late S1 + M	0	3	0.85
IMC1	TGGT1_231640	Late S1 + M	0	13	-4
IMC4	TGGT1_231630	Late S1 + M	0	5	-4.52
Beta-Tubulin	TGGT1_221620	Late S1 + M	0	2	-2.8
hypothetical protein	TGGT1_232340	?	0	13	-0.25
hypothetical protein	TGGT1_213040	no cycling	0	4	-4.77
hypothetical protein	TGGT1_209280	no cycling	0	4	-0.2
hypothetical protein	TGGT1_214980	no cycling	0	3	0.67
hypothetical protein	TGGT1_261620	G1	0	2	-3.46
