# Supplementary material for: Essential function of the alveolin network in the subpellicular microtubules and conoid assembly in Toxoplasma gondii
Source: eLife journal article supplement (doi:10.7554/elife.56635), 2020-05-07
Supplement: supp [file elife-56635-supp-v1.zip › elife_poa_e56635_Supplementary_file_2.xlsx]

## Sheet: All Identified Protein
Protein	Accession Number	IP - Biotin	IP + Biotin
acetyl-CoA carboxylase ACC1	TGGT1_221320	123	106
pyruvate carboxylase	TGGT1_284190	55	71
hypothetical protein	TGGT1_292950	0	55
hypothetical protein	TGGT1_238880	47	55
ribosomal protein RPS8	TGGT1_245460	48	39
ribosomal protein RPL3	TGGT1_227360	33	36
Apical Cap Protein 2	TGGT1_250820	0	27
Apical Cap Protein 8	TGGT1_229640	0	27
pre-rRNA processing protein	TGGT1_225125	17	27
hypothetical protein	TGGT1_261450	27	26
putative elongation factor 1-alpha (EF-1-ALPHA)	TGGT1_294800B	13	24
regulator of chromosome condensation RCC1	TGGT1_213900	18	24
putative elongation factor 1-alpha (EF-1-ALPHA)	TGGT1_286420A	0	22
hypothetical protein	TGGT1_241170	16	22
DEAD/DEAH box helicase domain-containing protein	TGGT1_208540	20	22
ribosomal protein RPS6	TGGT1_210690	19	21
GNL3L/Grn1 GTPase	TGGT1_203490	19	21
ribosomal RNA large subunit methyltransferase J protein	TGGT1_207990	15	20
ribosomal protein RPL26	TGGT1_248390	16	18
Sin3-associated polypeptide SAP18	TGGT1_201400	15	15
Apical Cap Protein 9	TGGT1_246950	3	14
hypothetical protein	TGGT1_207720	9	14
hypothetical protein	TGGT1_287180	12	14
SRP72 RNA-binding domain-containing protein	TGGT1_275802	13	14
ribosomal protein RPL28	TGGT1_229250A	15	14
Apical Cap Protein 3	TGGT1_308860	19	14
alveolin domain containing intermediate filament IMC1	TGGT1_231640	0	13
protein phosphatase 2C domain-containing proteins	TGGT1_232340	0	13
putative kinesin heavy chain	TGGT1_273560	3	13
hypothetical protein	TGGT1_307810	5	13
hypothetical protein	TGGT1_263320	12	13
hypothetical protein	TGGT1_314480	7	12
methyltransferase domain-containing protein	TGGT1_216560	8	12
ribosomal protein RPL8	TGGT1_204020	11	12
hypothetical protein	TGGT1_315610	12	12
NOL1/NOP2/sun family protein	TGGT1_288530	3	11
ribosomal protein RPL7A	TGGT1_261570	6	11
putative nucleolar protein	TGGT1_247470	7	10
DEAD/DEAH box RNA helicase family protein	TGGT1_219200	10	10
ribosomal protein RPS23	TGGT1_229670	12	10
putative polyubiquitin UbC	TGGT1_219820	5	9
ribosomal protein RPL19	TGGT1_289530	6	9
nucleolar protein	TGGT1_224970	6	9
ribosomal protein RPL27A	TGGT1_310490	9	9
ribosomal protein RPS24	TGGT1_215460	9	9
ribosomal protein RPL15	TGGT1_228470	13	9
hypothetical protein	TGGT1_306400	4	8
putative cell-cycle-associated protein kinase CLK	TGGT1_224480	5	8
hypothetical protein	TGGT1_271360	6	8
hypothetical protein	TGGT1_292190	6	8
ribosomal protein RPS26	TGGT1_243570	7	8
hypothetical protein	TGGT1_234390	7	8
hypothetical protein	TGGT1_216435	10	8
rRNA pseudouridine synthase	TGGT1_214210	11	8
brix domain-containing protein	TGGT1_273840	4	7
rhoptry protein ROP1	TGGT1_309590	5	7
hypothetical protein	TGGT1_212090	5	7
macro domain-containing protein	TGGT1_240250	6	7
ribosomal protein RPS3A	TGGT1_232710	6	7
brix domain-containing protein	TGGT1_222000	9	7
Noc2p family protein	TGGT1_260320	3	6
ribosomal protein RPL4	TGGT1_309120	4	6
ribosomal protein RPL13	TGGT1_263050	5	6
hypothetical protein	TGGT1_316350	5	6
RNA recognition motif-containing protein	TGGT1_215400	6	6
hypothetical protein	TGGT1_314750	0	5
putative protein kinase	TGGT1_281675	0	5
ribosomal protein RPS4	TGGT1_207440	0	5
alveolin domain containing intermediate filament IMC4	TGGT1_231630	0	5
SAG-related sequence SRS29B	TGGT1_233460	0	5
aspartate-tRNA ligase	TGGT1_202530	2	5
RNA recognition motif-containing protein	TGGT1_223855	3	5
ribosomal protein RPL35A	TGGT1_249250	4	5
ribosomal protein RPL32	TGGT1_267400	4	5
hypothetical protein	TGGT1_218070	4	5
ribosomal protein RPL21	TGGT1_245680	4	5
dual specificity phosphatase	TGGT1_268770	4	5
ribosomal protein RPL9	TGGT1_284560	4	5
ribosomal protein RPL34	TGGT1_227600	5	5
hypothetical protein	TGGT1_306195	6	5
ribosomal protein RPL23A	TGGT1_238010	6	5
protein phosphatase 2C domain-containing protein	TGGT1_244450	7	5
hypothetical protein	TGGT1_313890	0	4
hypothetical protein	TGGT1_213040	0	4
hypothetical protein	TGGT1_209280	0	4
ribosomal protein RPL13A	TGGT1_292130	0	4
hypothetical protein	TGGT1_214880	0	4
putative transmembrane protein	TGGT1_410360	0	4
helicase associated domain (ha2) protein	TGGT1_318440	2	4
hypothetical protein	TGGT1_258480	2	4
putative adenine nucleotide translocator	TGGT1_249900	2	4
putative nucleolar GTP-binding protein 1	TGGT1_261520	2	4
hypothetical protein	TGGT1_244420	2	4
GTP-binding nuclear protein ran/tc4	TGGT1_248340	2	4
ribosomal protein RPL18A	TGGT1_262670	2	4
ribosomal protein RPL17	TGGT1_299050	3	4
DNA-directed RNA polymerase I RPA1	TGGT1_244880	3	4
hypothetical protein	TGGT1_249570	3	4
DEAD/DEAH box helicase domain-containing protein	TGGT1_205540	3	4
actin ACT1	TGGT1_209030	3	4
ribosomal protein RPL44	TGGT1_203630	4	4
putative U1 snRNP-associated protein Usp106	TGGT1_262960	6	4
BRCA1 C Terminus (BRCT) domain-containing protein	TGGT1_239790	0	3
ribosomal protein RPS11	TGGT1_226970	0	3
putative ribosome biogenesis protein NSA2	TGGT1_242800	0	3
hypothetical protein	TGGT1_214980	0	3
hypothetical protein	TGGT1_258500	0	3
DEAD/DEAH box helicase family protein	TGGT1_279330	0	3
fructose-bisphospatase II	TGGT1_247510	0	3
RNA recognition motif-containing protein	TGGT1_262620	0	3
hypothetical protein	TGGT1_205320	0	3
ribosomal protein RPL5	TGGT1_320050	0	3
histone H2A1	TGGT1_261250	2	3
WD domain, G-beta repeat-containing protein	TGGT1_315140	2	3
tRNA binding domain-containing protein	TGGT1_223140	3	3
hypothetical protein	TGGT1_289970	3	3
DEAD/DEAH box ATP-dependent RNA helicase	TGGT1_312990	3	3
ribosomal protein RPS14	TGGT1_263700	3	3
alpha tubulin TUBA1	TGGT1_316400B	3	3
hypothetical protein	TGGT1_230180	3	3
histone H2Bb	TGGT1_251870	3	3
DEAD/DEAH box helicase domain-containing protein	TGGT1_270620	4	3
ribosomal protein RPL22	TGGT1_239760	4	3
ribosomal protein RPL10	TGGT1_288720	4	3
ribosomal protein RPL18	TGGT1_300000	6	3
heat shock protein HSP70	TGGT1_273760	0	2
TgIST	TGGT1_240060	0	2
chaperonin protein BiP	TGGT1_311720	0	2
hypothetical protein	TGGT1_266400	0	2
RNA recognition motif-containing protein	TGGT1_209850	0	2
glucose-6-phosphate 1-dehydrogenase	TGGT1_294200	0	2
dense granule protein GRA12	TGGT1_288650	0	2
ribosomal protein RPL11	TGGT1_309820	0	2
RNA recognition motif-containing protein	TGGT1_306600	0	2
signal peptidase	TGGT1_214090	0	2
putative aquarius	TGGT1_314410	0	2
putative cell-cycle-assocaited protein kinase ERK7	TGGT1_233010	0	2
DEAD/DEAH box helicase domain-containing protein	TGGT1_263820	0	2
hypothetical protein	TGGT1_261620	0	2
ATP-binding cassette sub-family F member 1	TGGT1_318710	0	2
putative beta-tubulin	TGGT1_221620	0	2
ribosomal protein RPS3	TGGT1_232300	2	2
hypothetical protein	TGGT1_314260	2	2
S1 RNA binding domain-containing protein	TGGT1_211670	2	2
putative eukaryotic initiation factor-4A	TGGT1_250770	2	2
actin	TGGT1_411760	3	2
acetyl-coA carboxylase ACC2	TGGT1_218560	14	2
putative rRNA-processing protein FCF1	TGGT1_319950	2	0
ribosomal protein RPL6	TGGT1_313390	2	0
hypothetical protein	TGGT1_221675B	3	0
ribosomal-ubiquitin protein RPS27A	TGGT1_245620	3	0
hypothetical protein	TGGT1_254300	3	0
ribosomal protein RPL37	TGGT1_239330	4	0
