# Supplementary material for: Essential function of the alveolin network in the subpellicular microtubules and conoid assembly in Toxoplasma gondii
Source: eLife journal article supplement (doi:10.7554/elife.56635), 2020-05-07
Supplement: supp [file elife-56635-supp-v1.zip › elife_poa_e56635_Supplementary_file_4.xlsx]

## Sheet: Sheet1
AC9 gRNA	GAACATAGATAGAAAATCTGGTTTTAGAGCTAGAAATAGC
AC9 mAID/ty forward	CGCGAACCGAGTGAATATCCGCAGGGAATGGCTAGCAAGGGCTCGGG
AC9 mAID/Ty reverse	TGCGTCTCGGCCATCTTGCGAAGACGCCTAATACGACTCACTATAGGG
AC10 gRNA	GTTGCTCTGGCAGGAGATTGGTTTTAGAGCTAGAAATAGC
AC9 mAID/ty forward	GTGTCCTCCGTACTGCAATTAAAGGCGAGAGCTAGCAAGGGCTCGGG
AC9 mAID/Ty reverse	CCTCCTCGTCATATGTGGCTGTAGAAATCCATACGACTCACTATAGGG
AC9 birA for	CGCGAACCGAGTGAATATCCGCAGGGAATGGCATTGGAACAAAAACTCAT
AC9 birA reverse	TTGCGAAGACGCCTACGCCCCTTCAGCTTTTAACCCTCACTAAAGGGAAC
AC9-HIS forward for gibson	CCGGTACCGACGTCTCCGGTCGAGGCTTTT
AC9-HIS reverse for gibson	CCGCGGCCGCTCACATTCCCTGCGGATATTC
AC2 gRNA	GCAGTTGTGGAACCCATAGACGTTTTAGAGCTAGAAATAGC
AC2 Ty forward	TTCAAGAGGGCGGGGAGAATTGTCATTTCCGCTAGCAAGGGCTCGGG
AC2 Ty reverse	ACCTGCCTTTCCTAGGACTAATTTGCCCTCATACGACTCACTATAGGG
AC8 gRNA	GAGAAAGGAAGAAACGCACAGTTTTAGAGCTAGAAATAGC
AC8 Ty forward	GGTCGAGTCTGTGGCGAGCGCCGCGGCAGCGCTAGCAAGGGCTCGGG
AC8 Ty reverse	CAGCCAAGAGAAAGCCCAACCTCCGTCCACATACGACTCACTATAGGG
Centrin2 gRNA	GGAAGCAGGGACGTTTCACAGTTTTAGAGCTAGAAATAGC
Centrin2 Ty forward	TATGCGATCATGACCAAGAAGACTTTCCCGGCTAGCAAGGGCTCGGG
Centrin2 Ty reverse	AGGCACTAAATACTCGGGAAAGAGTTGTGGATACGACTCACTATAGGG
MyoH gRNA	GCAACTGACGCAAGACTTGCGGTTTTAGAGCTAGAAATAGC
MyoH Ty forward	AATCCGAACTGGGATCCCATGGCCTACAACGCTAGCAAGGGCTCGGG
MyoH Ty reverse	CCTCCAGGCACTCTGTTTCCCTTTTGGGATATACGACTCACTATAGGG
RNG1 gRNA	GGTGTCGGCGATTTGGCGAAGTTTTAGAGCTAGAAATAGC
RNG1 Ty forward	CTTTGCCCTCCACCTGTCTACTACCTGGCGGCTAGCAAGGGCTCGGG
RNG1 Ty reverse	CTATTACTGCACTGTATACCCCTTCGGCCTATACGACTCACTATAGGG
KinA gRNA	ATCTGGAGCGAAGCGTTCAAGTTTTAGAGCTAGAAATAGC
KinesinA Ki forward ApaI	TTCGAGATTGGAGTTCTCAAGTCCAGCAAAGCTAGCAAGGGCTCGGG
KinesinA KI reverse NsiI	CACACACACATGCACGCACACACAGTCAGAATACGACTCACTATAGGG
RNG2 KI forward KpnI	GGGGTACCGCAGTCGTGTTCTGTGCATTTG
RNG2 KI reverse PstI	CCCTGCAGTAGAGTTTGTTGATGCGTCCGAGAC
ICMAP1 Ki forward ApaI	CGGGGCCCAAATGCACTCTGGCTACCGG
ICMAP1 KI reverse NsiI	GCATGCATGCCACCAGCCCCAACTGGAA
CPH1 KI forward ApaI	GTAGGGCCCCATCGCGAAAGGTTTAGGCC
CPH1 KI reverse SbfI	GTACCTGCAGGGTCTCGAAGAGACCAGAAAT
