# Supplementary figures and images for: Essential function of the alveolin network in the subpellicular microtubules and conoid assembly in Toxoplasma gondii
Source: eLife journal article supplement (doi:10.7554/elife.56635), 2020-05-07

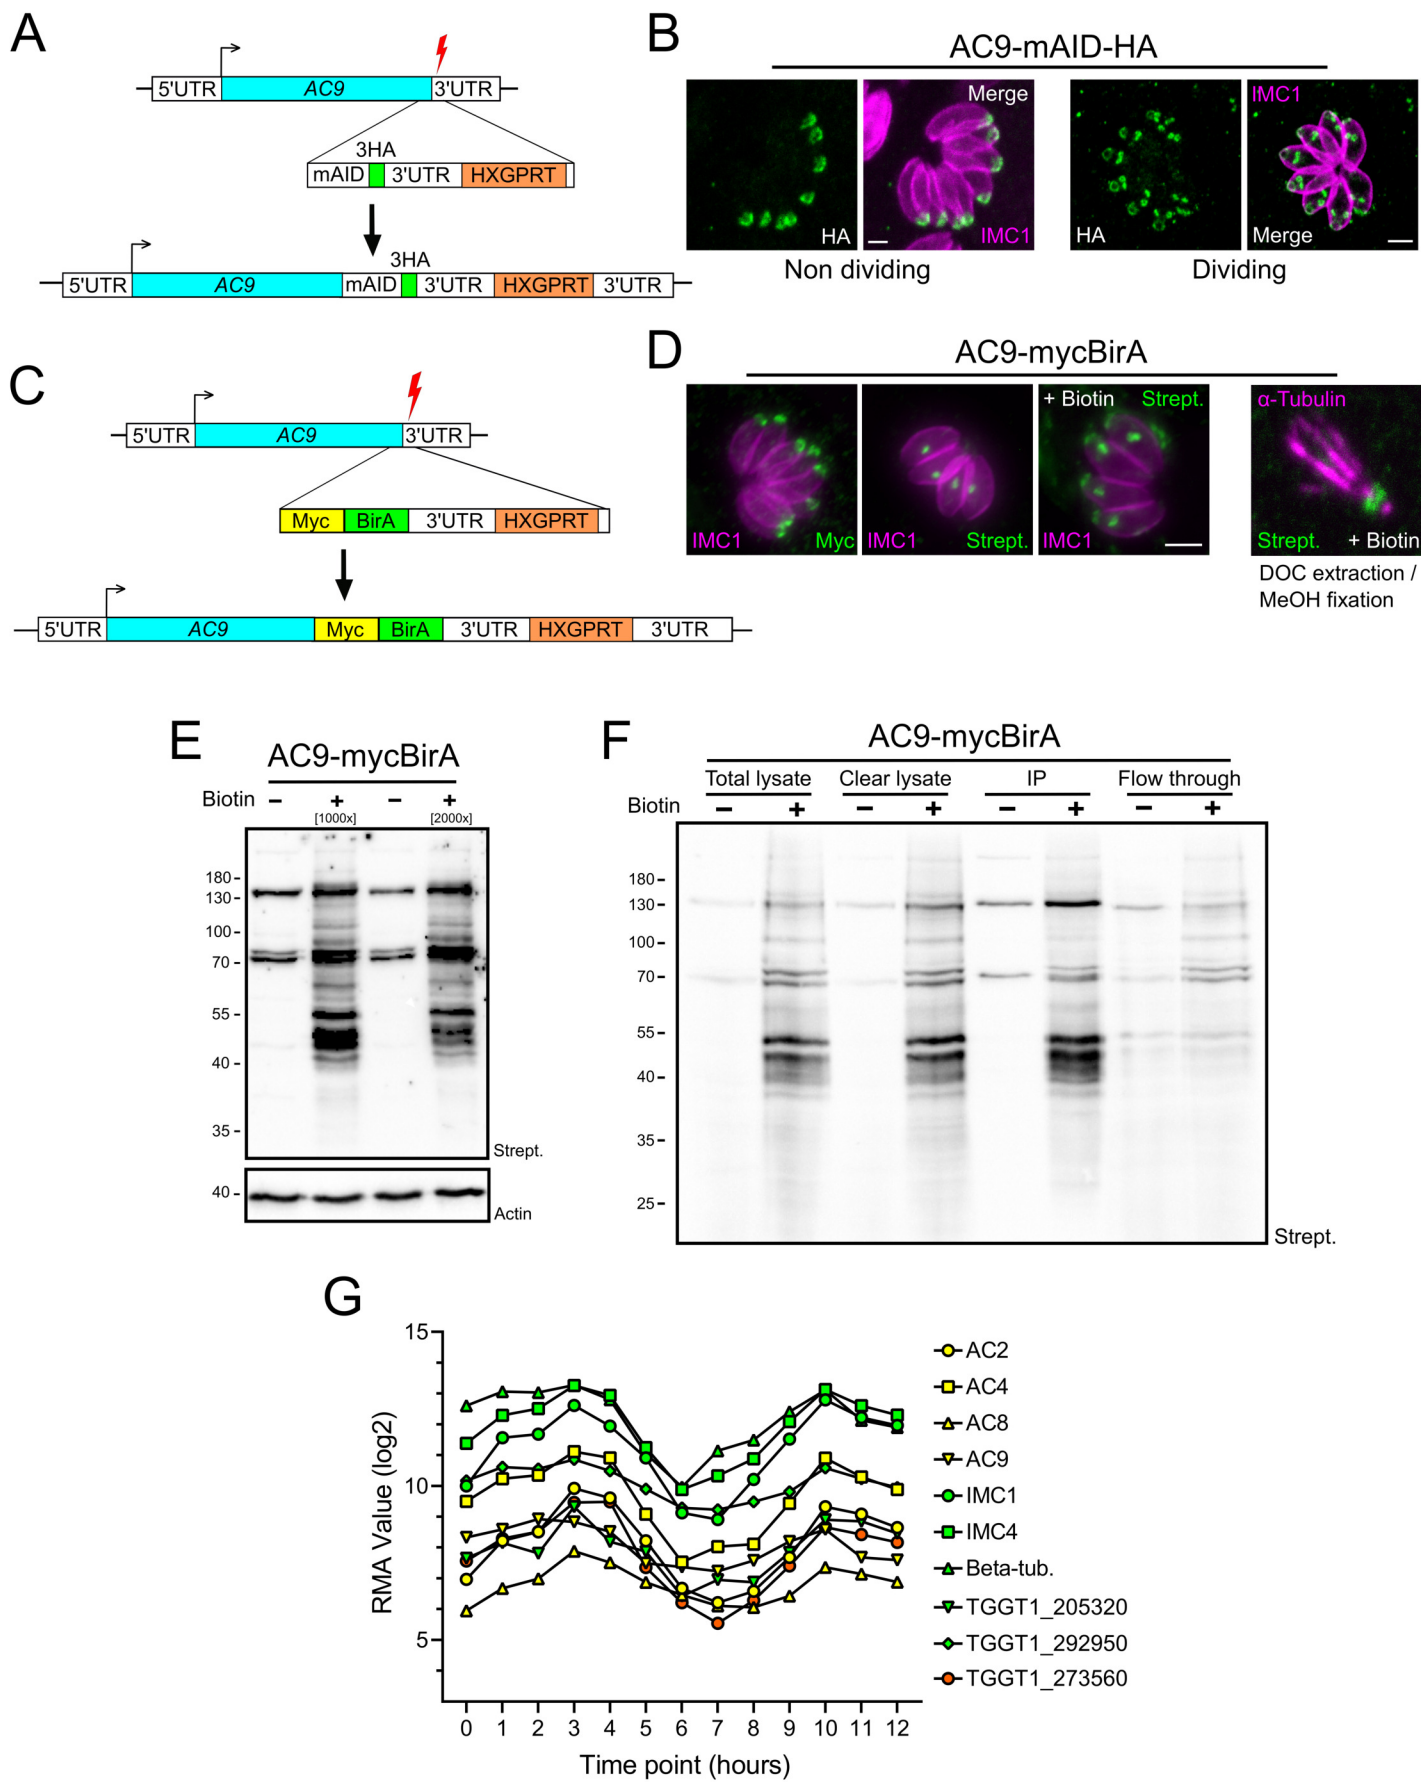

Supplement: supp [file elife-56635-supp-v1.zip › elife_poa_e56635_Figure_1_figure_supplement_1.pdf]

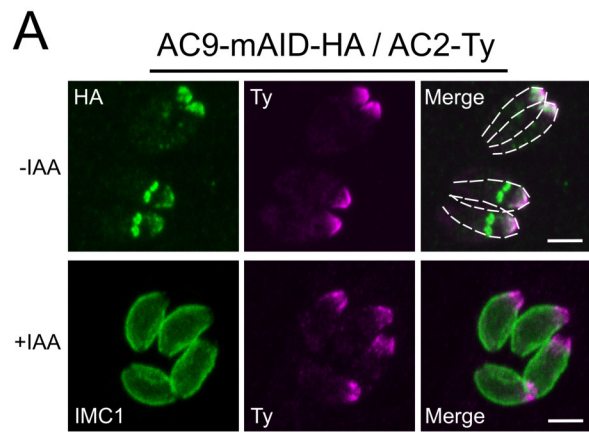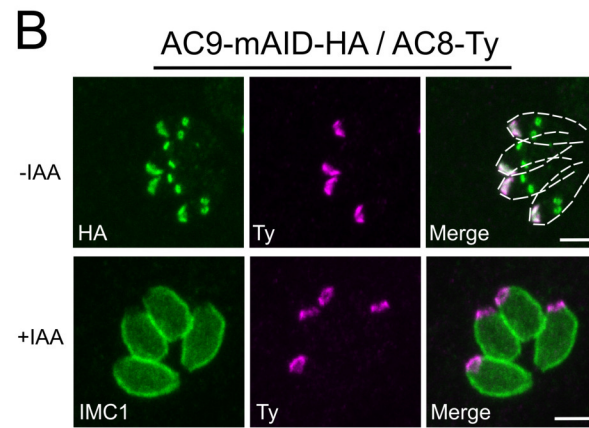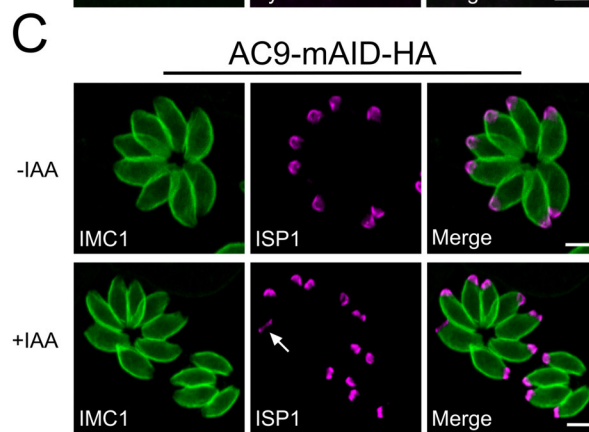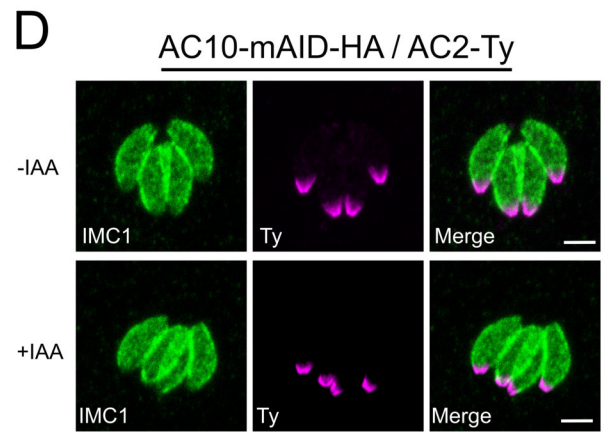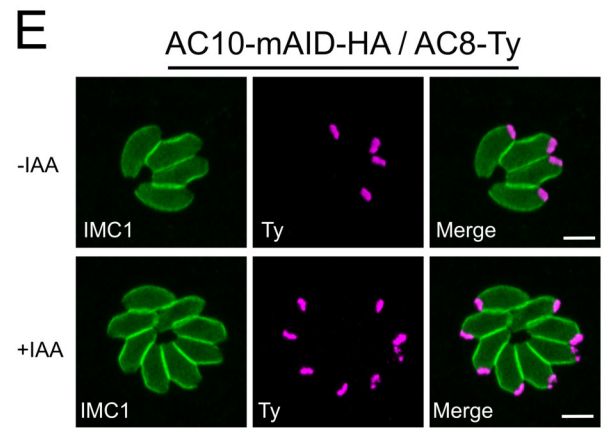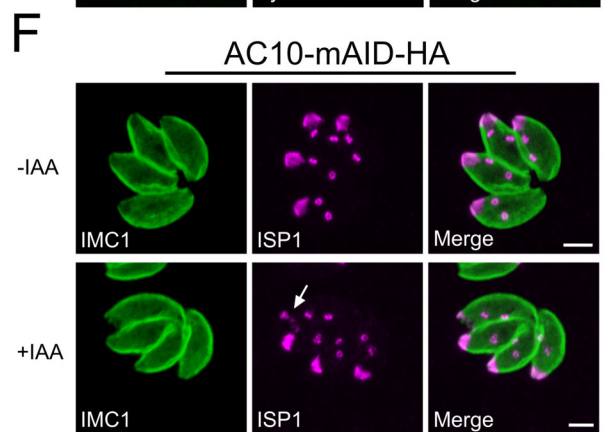

Supplement: supp [file elife-56635-supp-v1.zip › elife_poa_e56635_Figure_2_figure_supplement_1.pdf]

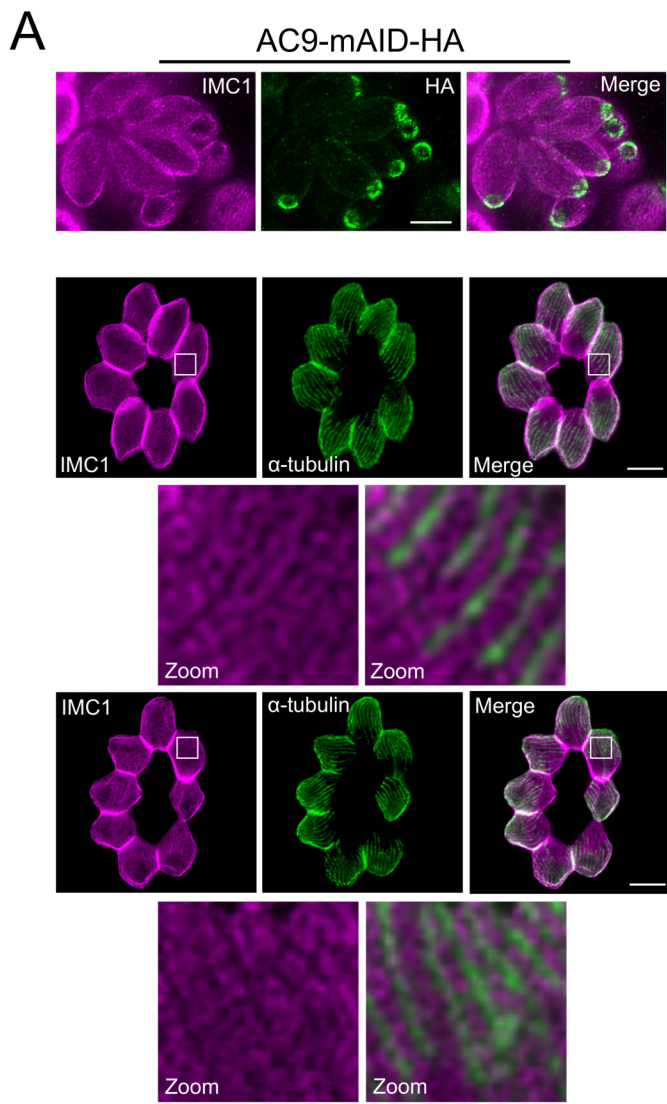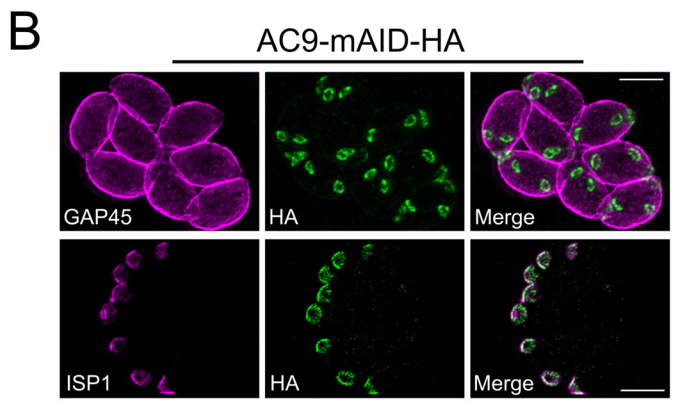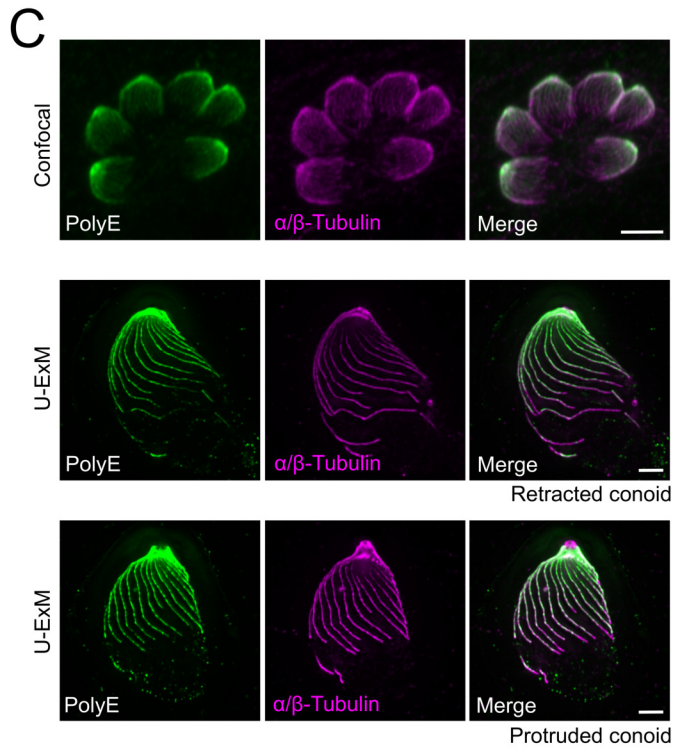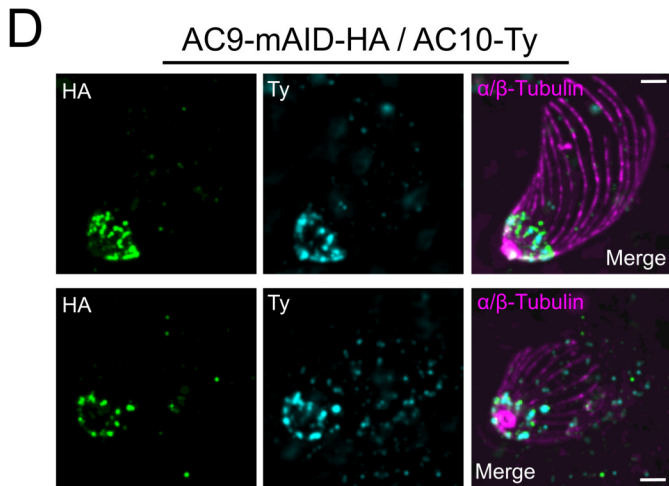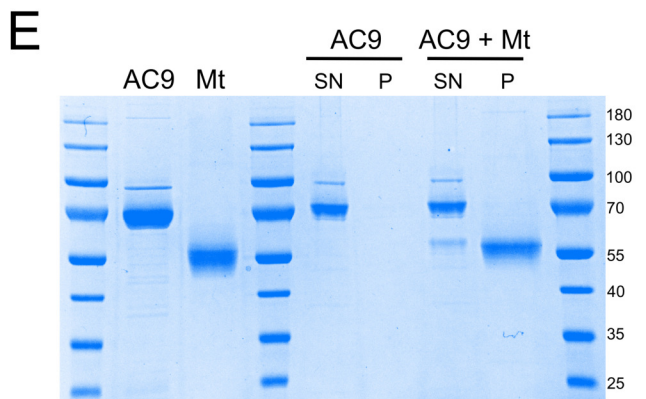

Supplement: supp [file elife-56635-supp-v1.zip › elife_poa_e56635_Figure_3_figure_supplement_1.pdf]

A

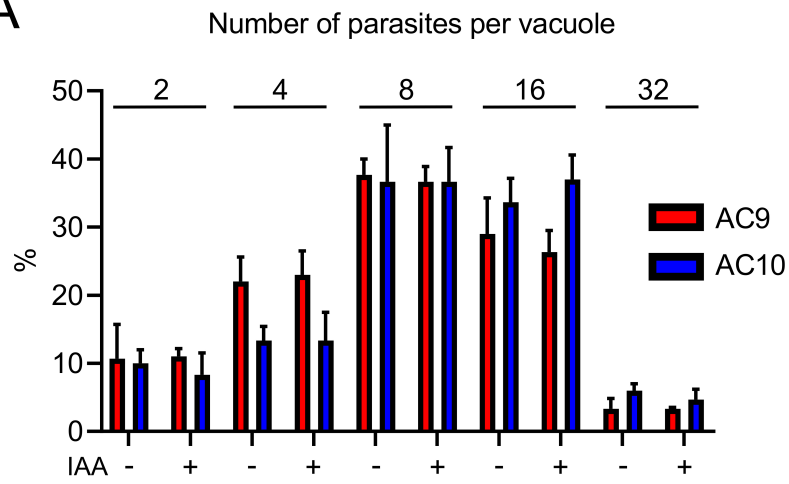

B

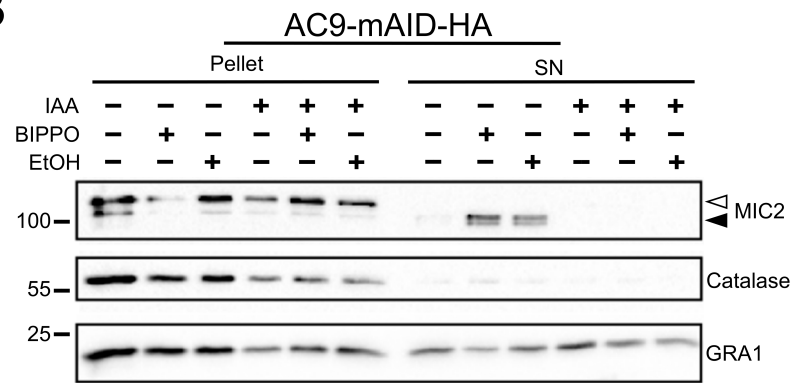

Supplement: supp [file elife-56635-supp-v1.zip › elife_poa_e56635_Figure_4_figure_supplement_1.pdf]

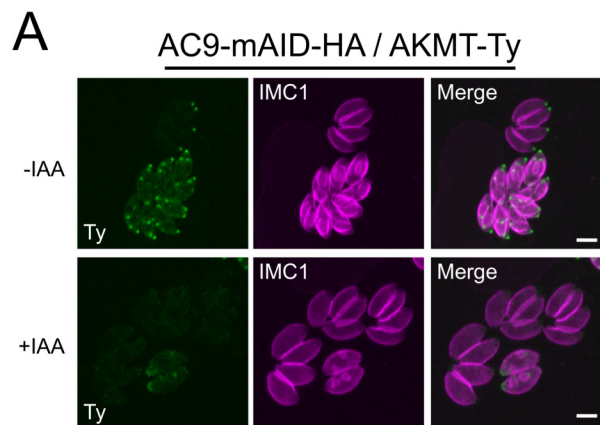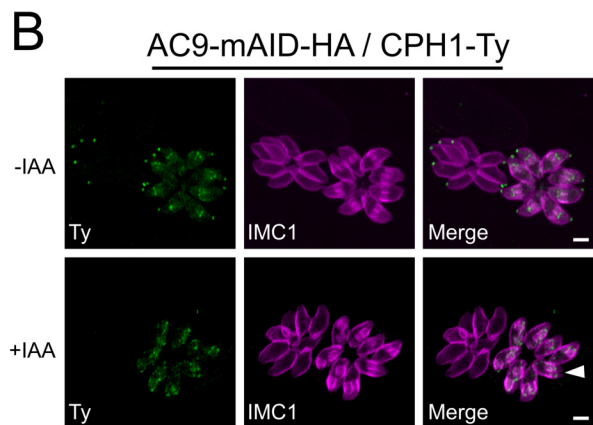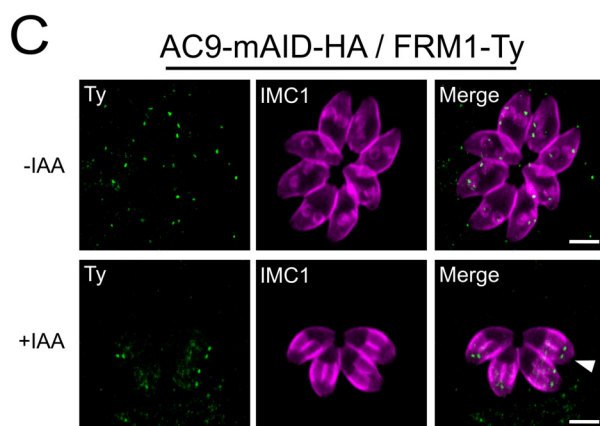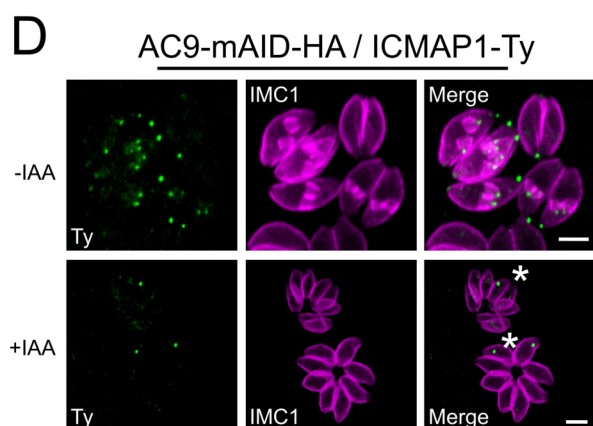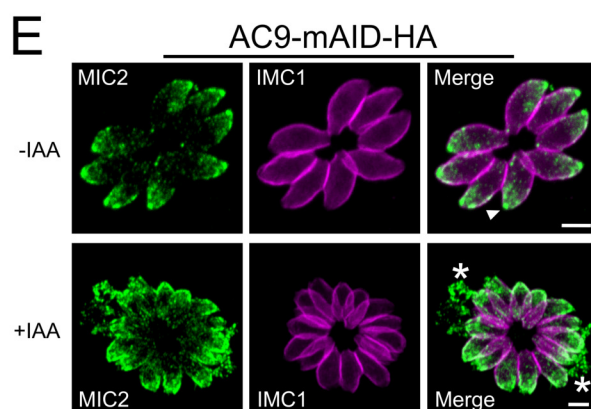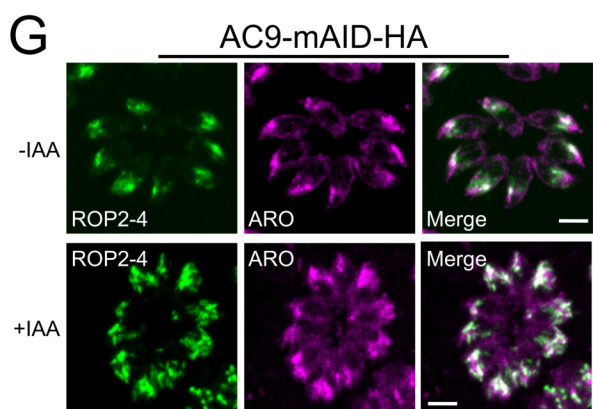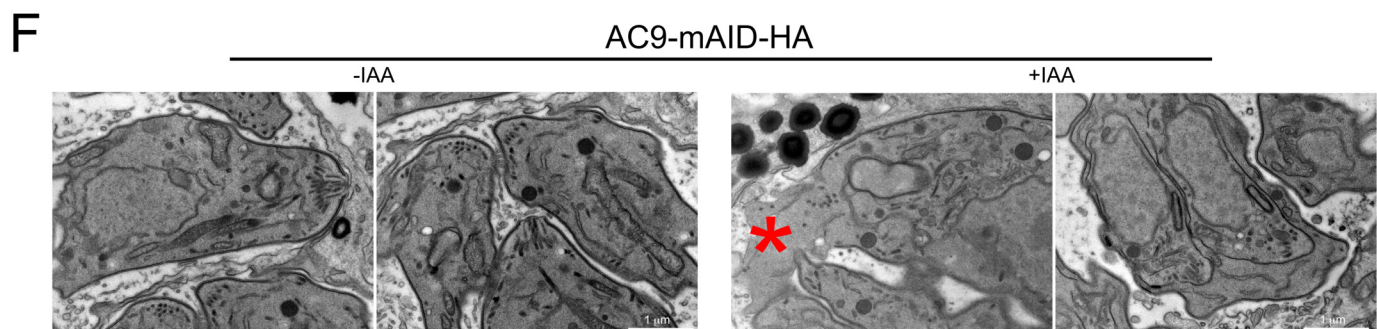

Supplement: supp [file elife-56635-supp-v1.zip › elife_poa_e56635_Figure_5_figure_supplement_1.pdf]

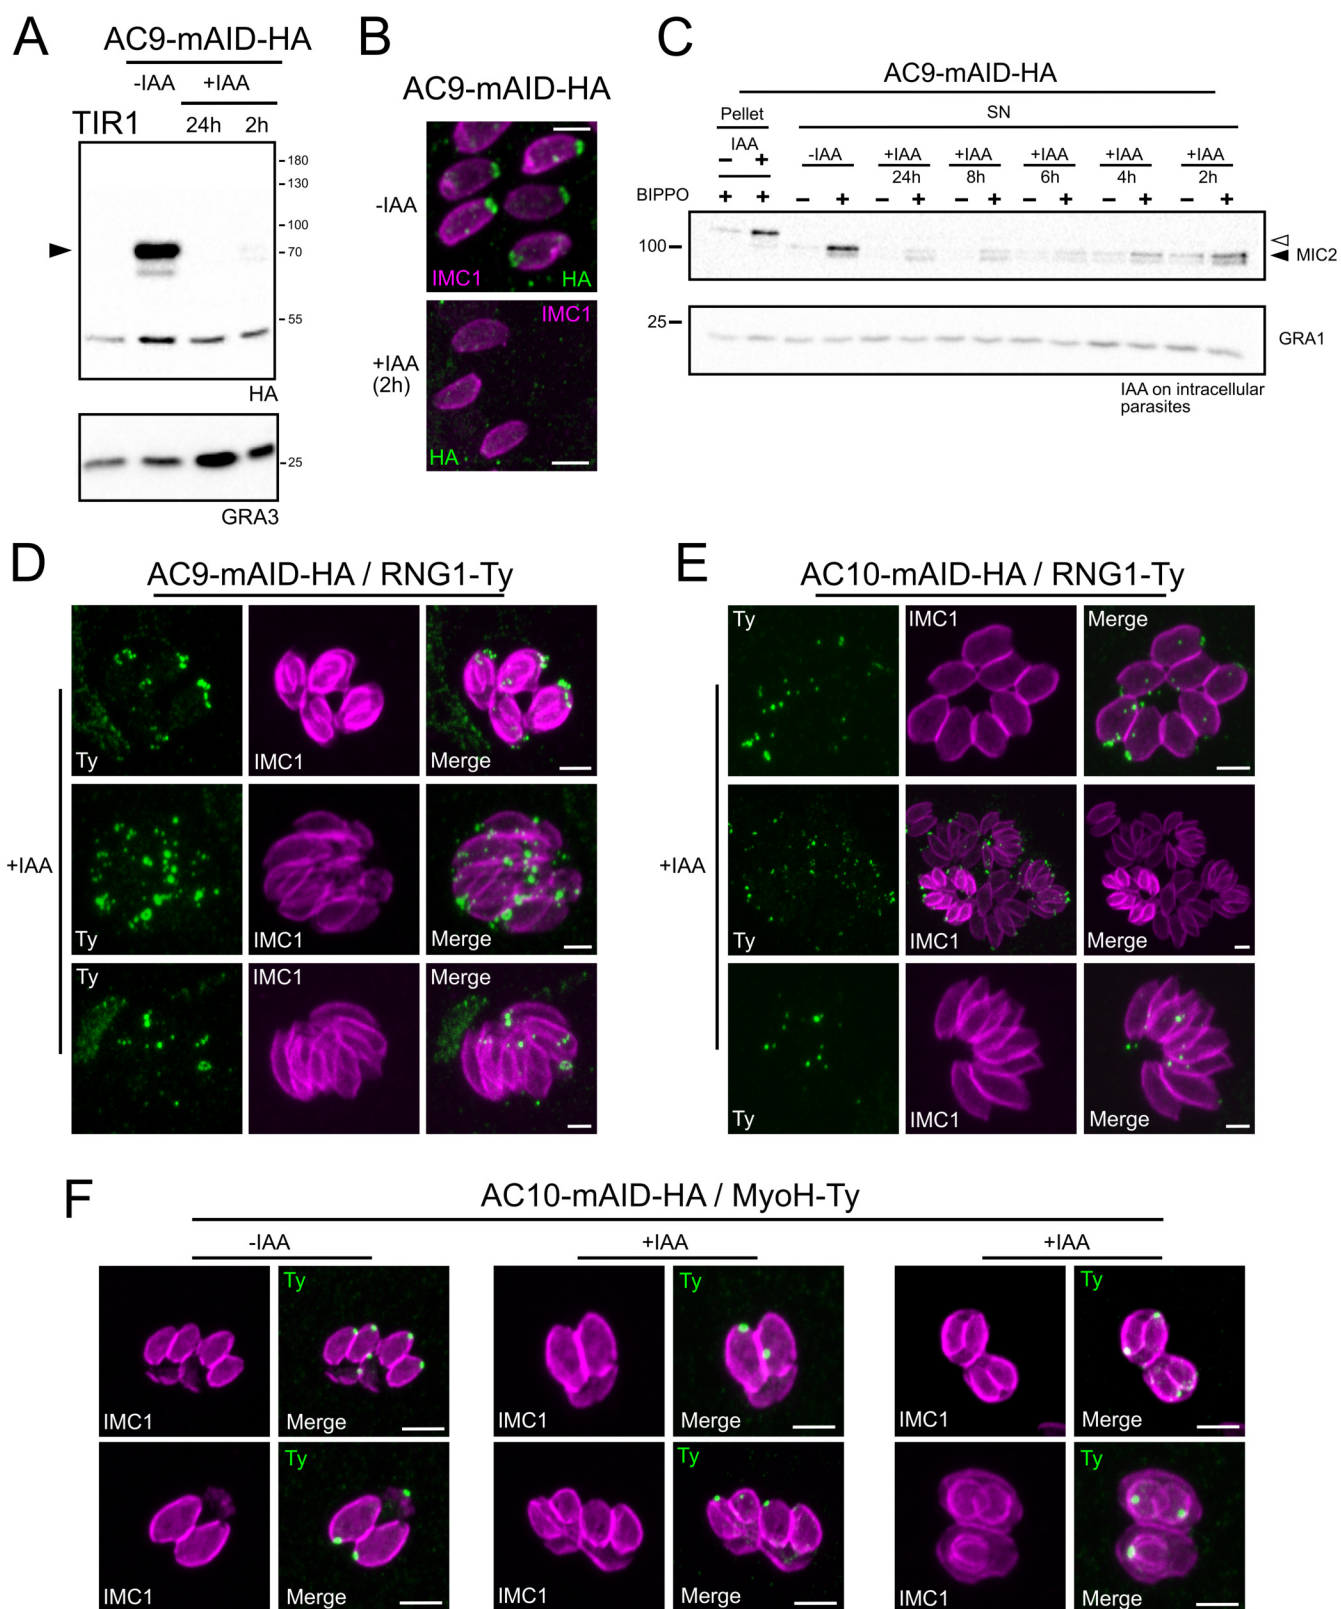

Supplement: supp [file elife-56635-supp-v1.zip › elife_poa_e56635_Figure_6_figure_supplement_1.pdf]

A

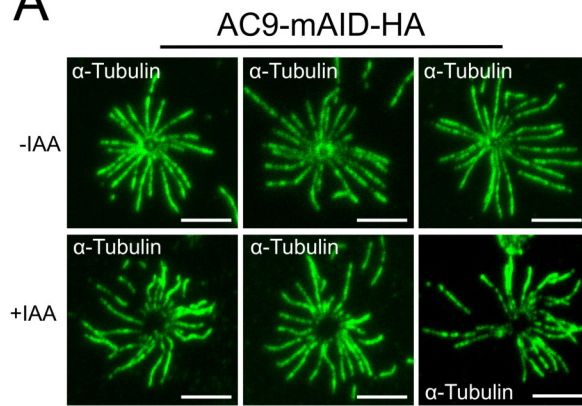

B

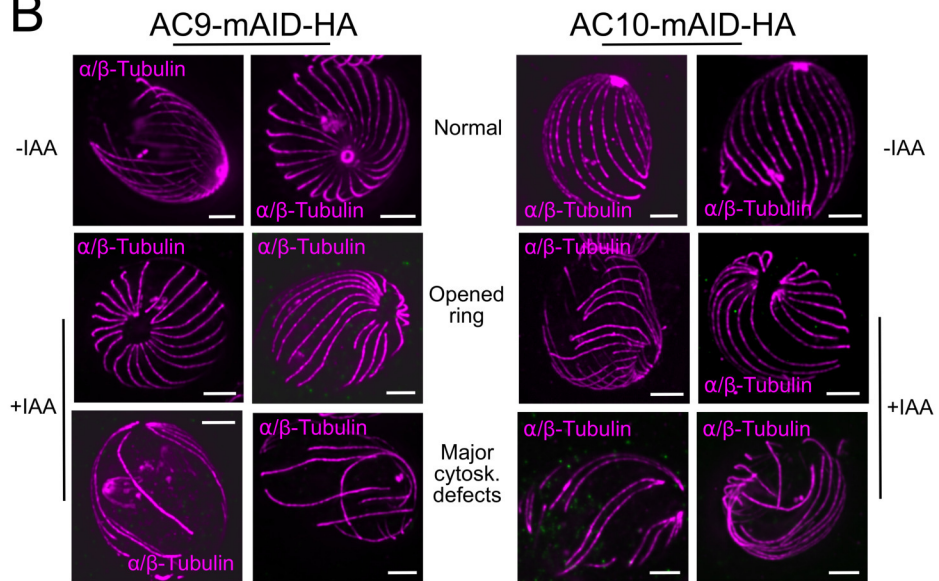

Supplement: supp [file elife-56635-supp-v1.zip › elife_poa_e56635_Figure_7_figure_supplement_1.pdf]
